# Supplementary material for: Epidemiological Investigation of Goose Astrovirus in Hebei Province, China, 2019–2021
Source: MDPI journal article supplement (doi:10.3390/microorganisms12050990), 2024-05-14
Supplement: s1 [file s1]

**Table S1.** Primers used for the detection of goose viruses in this study

| Primers    | Primer sequence           | Fragment size |
|------------|---------------------------|---------------|
| G1-ORF1b-F | CTGGACAGGCGAATTAGAAG      | 482           |
| G1-ORF1b-R | CCAAAGACATCGGCATACA       |               |
| G2-ORF1b-F | GCCTCTCTTCTGGCGGATAC      | 284           |
| G2-ORF1b-  | CCCTGAGTAACCTGAGCGTC      |               |
| DAstV F    | ANRTYTTTGGNATGTGGG        | 301           |
| DAstV R    | GAAGTCGGSSCCRACTTC        |               |
| GCoV F     | ACTCARWTRAATYTNAAATAYGC   | 251           |
| GCoV R     | TCACAYTTWGGATARTCCCA      |               |
| GPV F      | CCAAGCTACAACAACCACAT      | 539           |
| GPV R      | TGAGCGAACATGCTATGGAAGG    |               |
| CAstVF     | GAYCARCGAATGCGRAGRRTTG    | 362           |
| CAstVR     | TCAGTGGAAGTGGGKARTCTAC    |               |
| GPgV F     | CGACAAGGGTGCCTGCTGA       | 194           |
| GPgV R     | CCGTAGGTCGCATAGGT         |               |
| GoCV F     | CGATTAATAACCCTACCTTTGA    | 462           |
| GoCV R     | GACCAATCAGAACGATGACC      |               |
| AIV F      | TTCTAACCGAGGTCGAAAC       | 229           |
| AIV R      | AAGCGTCTACGCTGCAGTCC      |               |
| GHPV F     | GGTTAATTCCCTGACTCACA      | 1270          |
| GHPV R     | AATAAGCTTGCAGTTTCAGC      |               |
| GRV F      | CTTTTGTAGTCCTTGTGCAGCCATG | 1185          |
| GRV R      | GTAAGAGTCCAAGTCGTGGCAGAG  |               |
| DTMUV F    | GCCACGGAATTAGCGGTTGT      | 401           |
| DTMUV R    | TAATCCTCCATCTCAGCGGTGTAG  |               |
| NDV F      | TGGGCTCCAGACCTTTTAC       | 451           |
| NDV        | TGTTGGCAGCATTTTGT         |               |

**Table S2.** Primers used to amplify the complete genome of 2 genotypes GAsV

| Primer name | Primer sequence (5'→3')             | Segment position | Fragment size |
|-------------|-------------------------------------|------------------|---------------|
| 1F-1        | CCGAAAGCGTTGGTGAGAG                 | 1-19             | 1553          |
| 1R-1        | GGGTCCCACAGCTCATTGA                 | 1535-1553        |               |
| 1F-2        | GTACCACTTCAGATCTTACTG               | 1499-1519        | 1621          |
| 1R-2        | GGTTCATGCACCAGTTACAT                | 3100-3119        |               |
| 1F-3        | CCTTGAGCAGAGGAAGA                   | 3081-3098        | 1479          |
| 1R-3        | GACAAGCCTTCAGGTACC                  | 4542-4559        |               |
| 1F-4        | AAGGTGCAGATGGTACCTG                 | 4531-4549        | 1427          |
| 1R-4        | ATTTGACCTGCAGCTCC                   | 5940-5957        |               |
| 1F-5        | GGAAGATCTTTGGAGCTGC                 | 5929-5947        | 1327          |
| 1R-5        | TTGGTTCAAAAACAGAACCG                | 7236-7255        |               |
| 2F-1        | GCATGGGGAAACAGCGATA                 | 1-19             | 1561          |
| 2R-1        | TCGACACAGTACCGTCAGG                 | 1543-1561        |               |
| 2F-2        | GCGTGTCCACTATTACAGTC                | 1516-1536        | 1571          |
| 2R-2        | CTCGACCCACACCACTTACA                | 3067-3086        |               |
| 2F-3        | TCAACCTCTTGAGCAGCGC                 | 3039-3057        | 1724          |
| 2R-3        | TCACTGGCAGCGTGCTCCT                 | 4744-4762        |               |
| 2F-4        | ATCAACACGGTTGAGGAGC                 | 4731-4749        | 1564          |
| 2R-4        | CCCACCAATTGTGTGTTCC                 | 6276-6294        |               |
| 2F-5        | CGTGGAAGGACTTCAACATC                | 6246-6265        | 871           |
| 2R-5        | TAAACAAAAACCCGGTCAGG                | 7097-7116        |               |
| 2F-6        | CATGAGTGATCTCTTCACTAGCAGC           | 6939-6963        | 241           |
| 2R-6        | TTTTTTTTTTTTTTTTTTTATAAGATTTTAAATGC | 7139-7175        |               |

**Table S3.** Basic information about related AstVs

| Strain name                     | Genome accession number | Genotype |
|---------------------------------|-------------------------|----------|
| <b>HeB-CZ-2019*</b>             | OM264911.1              | GAstV 1  |
| <b>HeB-BD-2-2019*</b>           | OM264912.1              | GAstV 1  |
| <b>HeB-BD-1-2019*</b>           | OM264913.1              | GAstV 1  |
| <b>HeB-SJZ-2019*</b>            | OM264914.1              | GAstV 1  |
| <b>HeB-BD-3-2019*</b>           | OM200916.1              | GAstV 1  |
| JXGZ                            | OL762471.1              | GAstV 1  |
| JXYC                            | OL762472.1              | GAstV 1  |
| ZJC14                           | OK571391.1              | GAstV 1  |
| SCCD                            | MW340534.1              | GAstV 1  |
| TZ03                            | MW353015.1              | GAstV 1  |
| AHDY                            | MH410610.1              | GAstV 1  |
| FLX                             | KY271027.1              | GAstV 1  |
| <b>HeB-BD1-2020*</b>            | OL536330.1              | GAstV2   |
| <b>HeB-BD1-2021*</b>            | OM455388.1              | GAstV2   |
| <b>HeB-BD4-2019*</b>            | OM455389.1              | GAstV2   |
| AAstV/Goose/CHN/2022/SD05       | OP020131.1              | GAstV2   |
| JX01/China/2021                 | MZ576222.1              | GAstV2   |
| JSZ29                           | OL982615.1              | GAstV2   |
| SDPD                            | MW345727.1              | GAstV2   |
| AstV/Goose/2018/HLJ01           | MN175321.1              | GAstV2   |
| GD                              | MG934571.1              | GAstV2   |
| JSHA                            | MK125058.1              | GAstV2   |
| JSCZ15                          | OL982614.1              | GAstV2   |
| HN1G                            | KY807085.1              | GAstV2   |
| DA06                            | FJ919225.1              | DAstV-1  |
| SL1                             | KF753804.1              | DAstV-2  |
| CPH                             | KJ020899.1              | DAstV-3  |
| YP2                             | JX624774.1              | DAstV-4  |
| CAstV/Chicken/CHN/2020/GD202013 | MW846319.1              | CAstV    |
| G-4260                          | NC_003790.1             | ANV-1    |
| AVE52-ANV2                      | MH028405.1              | ANV-2    |
| TAstV-CA-00                     | EU143844.1              | TAstV-2  |
| TAstV-1                         | Y15936.2                | TAstV-1  |
| Pune-063681-India               | JF327666.1              | HAstV    |
| 668                             | MK089435.1              | HAstV    |

Note: \* represents the strain isolated in this study.

**Table S4.** The detection results of GAstV for 474 samples

| Origin city  | Sample time | Sample quantity | Number of genotype 1 positive | Number of genotype 2 positive | Mixed positive number |
|--------------|-------------|-----------------|-------------------------------|-------------------------------|-----------------------|
| Shijiazhuang | 2019        | 34              | 41.18%(14/34)                 | 61.67%(21/34)                 | 38.24%(13/34)         |
|              | 2020        | 25              | 48%(12/25)                    | 60%(15/25)                    | 36%(9/25)             |
|              | 2021        | 14              | 42.86%(6/14)                  | 71.43%(10/14)                 | 35.71%(5/14)          |
|              | Total       | 73              | 43.84%(32/73)                 | 63.01%(46/73)                 | 36.99%(27/73)         |
| Baoding      | 2019        | 38              | 39.47%(15/38)                 | 44.74%(17/38)                 | 31.58%(12/38)         |
|              | 2020        | 27              | 44.44%(12/27)                 | 48.15%(13/27)                 | 29.63%(8/27)          |
|              | 2021        | 20              | 50%(10/20)                    | 60%(12/20)                    | 25%(5/20)             |
|              | Total       | 85              | 43.53%(37/85)                 | 49.41%(42/85)                 | 29.41%(25/85)         |
| Cangzhou     | 2019        | 31              | 38.71%(12/31)                 | 48.39%(15/31)                 | 25.81%(8/31)          |
|              | 2020        | 23              | 34.78%(8/23)                  | 39.13%(9/23)                  | 26.09%(6/23)          |
|              | 2021        | 12              | 50%(6/12)                     | 66.67%(8/12)                  | 50%(6/12)             |
|              | Total       | 66              | 39.39%(26/66)                 | 48.48%(32/66)                 | 30.30%(20/66)         |
| Hengshui     | 2019        | 28              | 42.86%(12/28)                 | 53.57%(15/28)                 | 35.71%(10/28)         |
|              | 2020        | 20              | 45%(9/20)                     | 75%(15/20)                    | 35%(7/20)             |
|              | 2021        | 16              | 50%(8/16)                     | 25%(4/16)                     | 25%(4/16)             |
|              | Total       | 64              | 45.31%(29/64)                 | 53.13%(34/64)                 | 32.81%(21/64)         |
| Xingtai      | 2019        | 24              | 66.67%(16/24)                 | 58.33%(14/24)                 | 37.50%(9/24)          |
|              | 2020        | 18              | 66.67%(12/18)                 | 44.44%(8/18)                  | 16.67%(3/18)          |
|              | 2021        | 9               | 33.33%(3/9)                   | 33.33%(3/9)                   | 22.22%(2/9)           |
|              | Total       | 51              | 60.78%(31/51)                 | 49.02%(25/51)                 | 27.45%(14/51)         |
| Langfang     | 2019        | 13              | 15.38%(2/13)                  | 23.08%(3/13)                  | 7.69%(1/13)           |
|              | 2020        | 9               | 22.22%(2/9)                   | 44.44%(4/9)                   | 11.11%(1/9)           |
|              | 2021        | 7               | 28.57%(2/7)                   | 28.57%(2/7)                   | 0(0/7)                |
|              | Total       | 29              | 20.69%(6/29)                  | 31.03%(9/29)                  | 6.90%(2/29)           |
| Dingzhou     | 2019        | 39              | 41.03%(16/39)                 | 46.15%(18/39)                 | 30.77%(12/39)         |
|              | 2020        | 27              | 44.44%(12/27)                 | 74.07%(20/27)                 | 33.33%(9/27)          |
|              | 2021        | 14              | 57.14%(8/14)                  | 71.43%(10/14)                 | 50%(7/14)             |
|              | Total       | 80              | 45%(36/80)                    | 60%(48/80)                    | 35%(28/80)            |
| Tangshan     | 2019        | 14              | 28.57%(4/14)                  | 42.86%(6/14)                  | 21.43%(3/14)          |
|              | 2020        | 9               | 44.44%(4/9)                   | 55.56%(5/9)                   | 33.33%(3/9)           |
|              | 2021        | 3               | 33.33%(1/3)                   | 66.67%(2/3)                   | 33.33%(1/3)           |
|              | Total       | 26              | 34.62%(9/26)                  | 50%(13/26)                    | 26.92%(7/26)          |
| Total        | -           | 474             | 43.46%(206/474)               | 52.53%(249/474)               | 30.38%(144/474)       |

**Table S5.** Time of death of goose embryos after AstVs inoculation (n=10)

| Strain name   | Time*       |
|---------------|-------------|
| HeB-CZ-2019   | 52.20±12.35 |
| HeB-BD-2-2019 | 79.20±6.81  |
| HeB-BD-1-2019 | 80.40±3.10  |
| HeB-SJZ-2019  | 73.20±10.12 |
| HeB-BD-3-2019 | 75.60±6.45  |
| HeB-BD1-2020  | 43.20±5.98  |
| HeB-BD1-2021  | 30.00±4.90  |
| HeB-BD4-2019  | 40.00±8.59  |

\*hours post infection (hpi)
